# Supplementary material for: Distinct Neural Profiles of Frontoparietal Networks in Boys with ADHD and Boys with Persistent Depressive Disorder
Source: bioRxiv or medRxiv preprint supplement (doi:10.1101/2021.03.09.434662), 2022-03-16
Supplement: Supplementary file [file media-1.pdf]

## Supplementary Material

### Method

#### *fMRI task*

A Sternberg type working memory task divided into verbal and spatial working memory components was adapted from Thomason et al. (2009). Each trial began with a central fixation cross displayed for 400 ms. In the verbal task participants were presented with an array of capital letters, two in the low load condition and six in the high load condition for a duration of 500 ms. After a 3000 ms delay a single letter in lower case was presented for 1500 ms and participants indicated by button-press whether the letter was present in the previously shown array. In the verbal control condition only one type of letter was shown, two in the low and six in the high load condition and the 3000 ms delay was shortened to a 100 ms delay. Only consonants were used and letters were not repeated if they appeared in the previous two trials. In the spatial task either one or five black dots were presented randomly across 52 possible locations arranged on four invisible circles around fixation. After a 3000 ms delay a probe appeared in the form of a circle that matched or did not match the location of one of the previously displayed dots. Participants needed to indicate whether the location of the probe matched the location of the dot on the screen. As in the verbal task, the control condition only had a 100 ms delay and all but one circle were greyed out. Locations were not repeated over three consecutive trials. Control tasks were designed to match experimental conditions on as many elements as possible (motor response, decision making, visual stimuli, luminance) except for the working memory component. For both, verbal and spatial conditions, probes matched the target 50% of the time. The total duration of the experimental and control trials were matched. For each task, a total of 64 trials (32 experimental, 32 control) were presented in 16 blocks of four trials. Blocks alternated between experimental and control conditions in a pseudorandom fashion. Each condition was repeated four times. Total trial length was 5400

ms, which equates to a block length of 21.6 s together with an inter-block interval of 3000 ms resulting in a total scan time of 7 min and 10 s for each task. For the purpose of the current analysis, we combined high and low load conditions to maximize the number of trials to be used in the MVPA analysis. The task was programmed and presented using Presentation Software Version 14.2 (Neurobehavioral Systems, Berkeley). Stimuli were displayed using Helvetica font (size: 45 pt) in black on a white background. The order of presentation of verbal and spatial tasks in the scanner was counterbalanced across participants. All young people were allowed to practice sample trials of the task on a Toshiba laptop before entering the scanner. The scripts for the tasks can be downloaded from our OSF repository: <https://osf.io/a5349/>.

*MVPA Signal Detection Metrics: (Accuracy, Sensitivity, Specificity, ROC, AUC)*

The linear SVM classifier generates signal detection metrics from a confusion matrix that can be used to evaluate performance of the classification model (Zhu et al., 2010). An example confusion matrix and corresponding relevant metrics (e.g., classification accuracy, sensitivity, specificity) is illustrated in Supplement Figure 1a. Importantly, these metrics can be utilized to facilitate quantitative comparison of model performance between networks and groups via a receiver operating characteristic (ROC) curve and area under the ROC curve (AUC). These computations for each metric are detailed in the subsequent paragraphs.

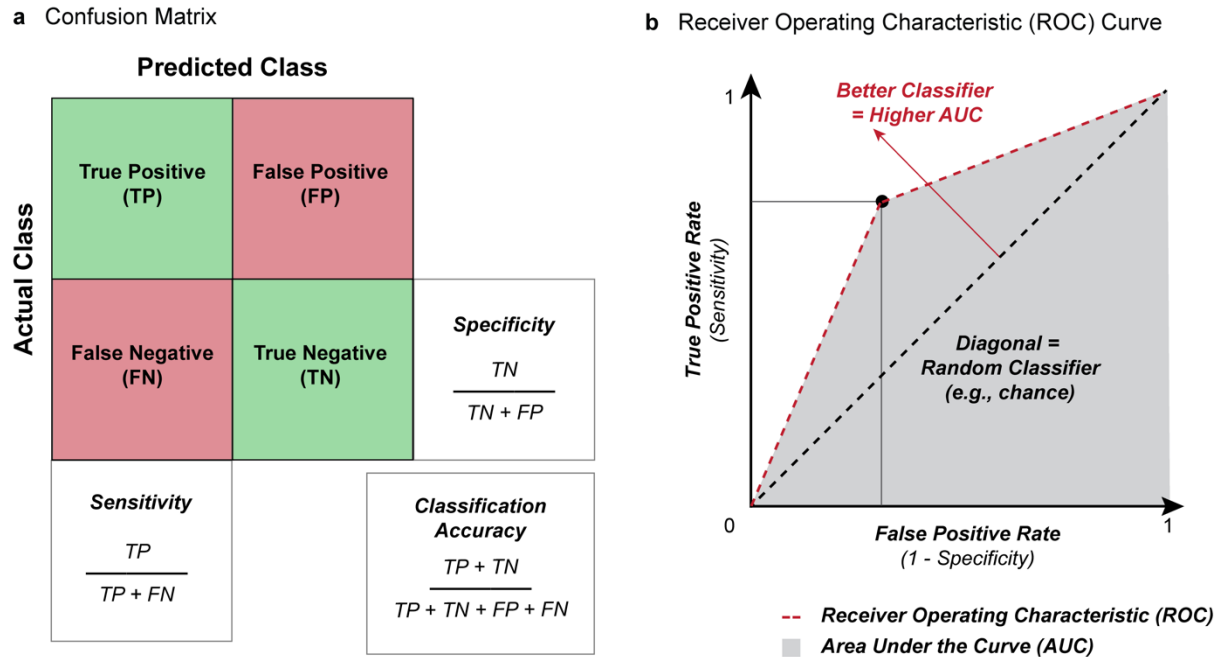

**Figure S1:** a) Illustration of confusion matrix that summarizes the performance of the classification model, as well as computations for relevant signal detection metrics (e.g., classification accuracy, sensitivity and specificity). b) Illustration of an empirical receiver operating characteristic (ROC) curve that is generated from the true positive rate (sensitivity) and false positive rate (1-specificity). The area under the ROC curve (AUC) can be computed from this empirical ROC function.

For each network within each group, we evaluated **classification accuracy**, which refers to the proportion of correctly classified observations (i.e., both true positives [TP] and true negatives [TN] divided by all observations including true positives [TP], true negatives [TN], false positives [FP] and false negatives [FN]), a commonly used metric for linear SVM model comparison. Critically, because we used leave-one-subject-out cross validation, we were able to estimate the average accurate performance of the classifier across subjects within each group for each network. The equation for computing classification accuracy is shown below.

$$\text{Classification Accuracy} = \frac{TP + TN}{TP + TN + FP + FN}$$

Another relevant metric we computed is the model's **sensitivity**, which refers to the proportion of true positive assessments (e.g., true positive rate) correctly identified by the

model. In other words, the sensitivity reflects how good the model is at correctly detecting the true positives in the data (e.g., correctly classifying a subject's verbal working memory beta estimate as a verbal working memory beta estimate), such that a higher value decreases the likelihood of false positive results.

$$Sensitivity = \frac{TP}{TP + FN}$$

Next, we also computed the model's *specificity*, which refers to the proportion of true negative assessments (i.e., true negative rate) correctly identified by the model. In other words, the specificity reflects the degree to which the model correctly detecting true negatives in the data (e.g., correctly classifying a subject's verbal working memory beta estimate as not a spatial working memory beta estimate), such that higher value decreases the likelihood of false negative results.

$$Specificity = \frac{TN}{TN + FP}$$

Finally, as both specificity and sensitivity measures provide important complementary information about the classifier performance, we combined both measures into a receiver operating characteristic (**ROC**) curve to evaluate and compare the diagnostic ability of the classifier between networks and between groups. Specifically, the ROC curve encompasses both the *false positive rate* (1-specificity) and *true positive rate* (sensitivity), and the area under the ROC curve (also known as **AUC**) reflects an aggregate measure of classifier performance across all possible classification thresholds (See Supp Figure 1b). Critically, we can compute an **AUC** measure for classifier performance for each network, which allows for a quantitative comparison of which networks are better for differentiating between verbal and spatial working memory in each group as well as comparison of classifier performance between groups.

## Results

**Table S1:** Mean (SD) for task performance measures for each group for the verbal and spatial task. Accuracy refers to the number of correct trials (out of 28 total trials per experimental and control condition), reaction times are presented in milliseconds (ms).

|               | Accuracy (Number of Correct Trials) |        |         |        | Reaction Times (ms) |        |         |        |
|---------------|-------------------------------------|--------|---------|--------|---------------------|--------|---------|--------|
|               | Experimental                        |        | Control |        | Experimental        |        | Control |        |
|               | Spatial                             | Verbal | Spatial | Verbal | Spatial             | Verbal | Spatial | Verbal |
| <b>TD</b>     | 25.22                               | 25.53  | 30.67   | 31.00  | 1112                | 1059   | 914     | 872    |
| <b>(n=19)</b> | (2.90)                              | (3.86) | (1.75)  | (1.33) | (328)               | (253)  | (308)   | (301)  |
| <b>PDD</b>    | 23.62                               | 23.19  | 29.94   | 30.56  | 1305                | 1132   | 906     | 823    |
| <b>(n=16)</b> | (4.54)                              | (2.64) | (2.29)  | (2.10) | (659)               | (472)  | (331)   | (205)  |
| <b>ADHD</b>   | 23.95                               | 23.40  | 30.20   | 29.95  | 1157                | 1043   | 892     | 853    |
| <b>(n=20)</b> | (4.41)                              | (3.59) | (2.02)  | (2.26) | (544)               | (190)  | (170)   | (191)  |

### Head Motion

To test for effects of head motion between the task conditions within each group, we conducted t-tests for the Euclidean norm of the motion parameters (enorm) between spatial vs. verbal stimulus material in both working memory conditions and control conditions. In the working memory conditions, head motion did not differ between the verbal and spatial working memory task components (PDD  $t(15)=1.70$ ,  $p=0.110$ ; ADHD  $t(19)=-.02$ ,  $p=0.981$ ; TD  $t(18)=-.23$ ,  $p=0.822$ ). In the control conditions, head motion also did not differ between the two tasks (PDD  $t(15)=1.45$ ,  $p=0.167$ ; ADHD  $t(19)=0.44$ ,  $p=0.665$ ; TD  $t(18)=-1.31$ ,  $p=0.207$ ). All means and standard deviations of the enorm by condition are listed in Table S2.

**Table S2:** Mean (SD) of the Euclidean norm of head motion for the verbal and spatial task for each group.

|                    | Experimental |             | Control     |             |
|--------------------|--------------|-------------|-------------|-------------|
|                    | Spatial      | Verbal      | Spatial     | Verbal      |
| <b>TD (n=19)</b>   | .119 (.227)  | .124 (.254) | .110 (.119) | .124 (.230) |
| <b>PDD (n=16)</b>  | .157 (.275)  | .119 (.167) | .161 (.254) | .135 (.169) |
| <b>ADHD (n=20)</b> | .208 (.361)  | .205 (.358) | .210 (.376) | .200 (.342) |

Permutation Distributions for Classification Accuracy for ROI and group

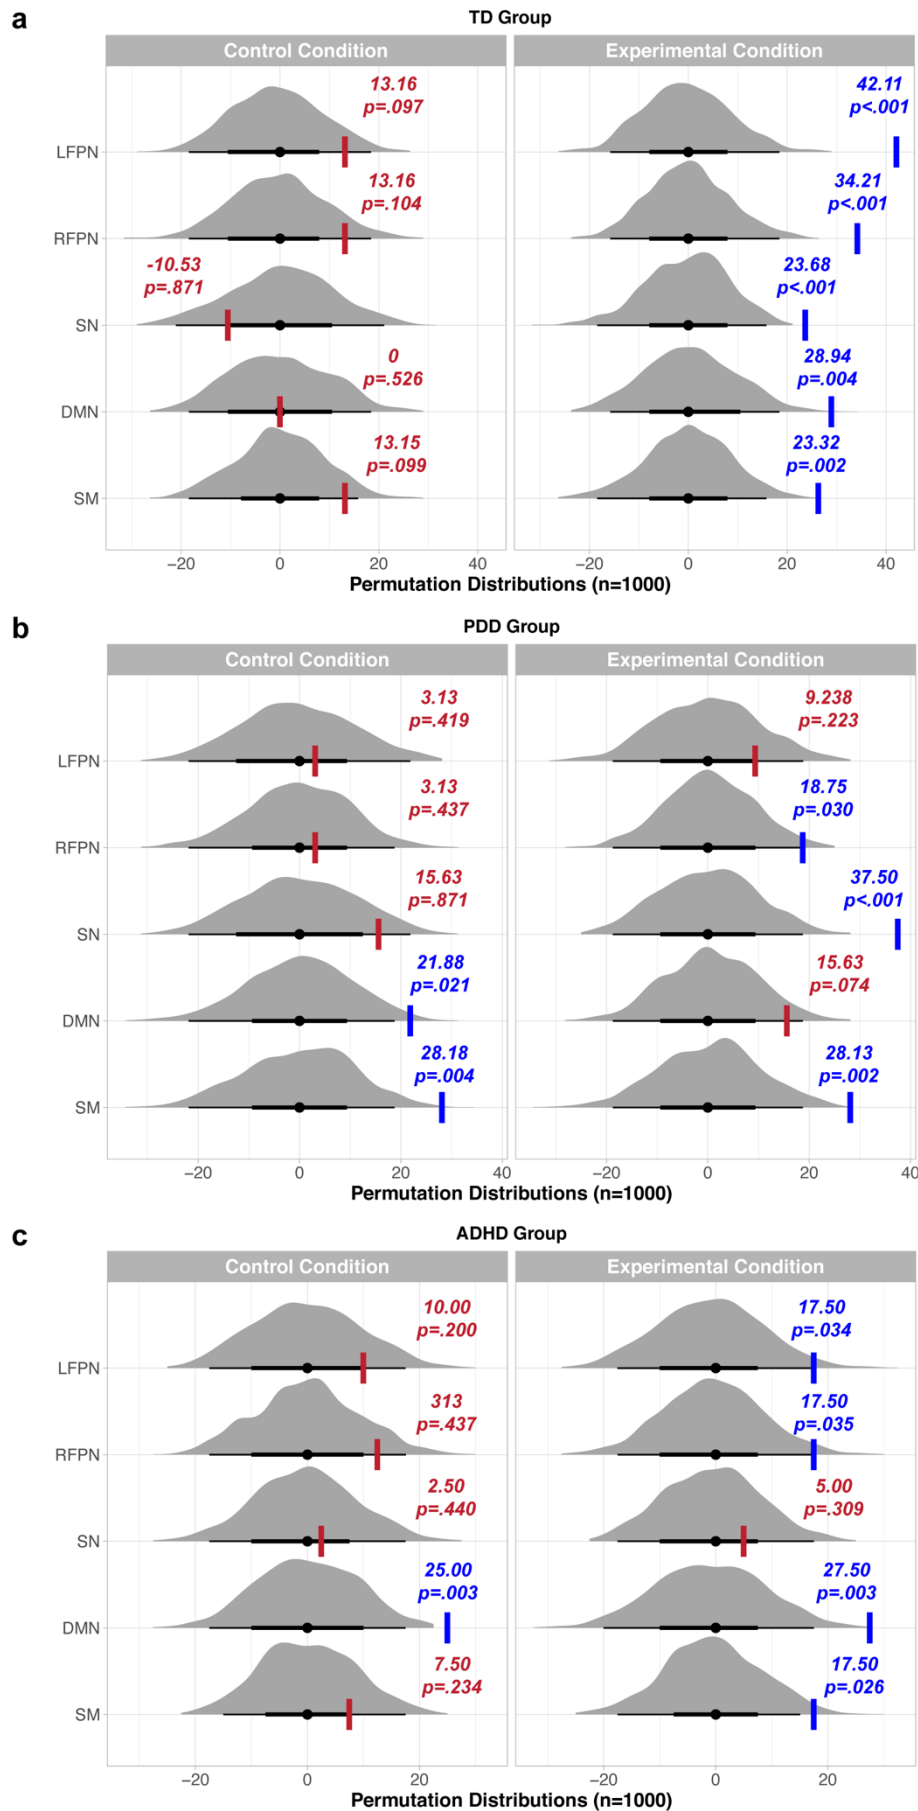

**Figure S2:** Permutation Distributions (n=1000) to compute p-values (1-tailed, right side) for classification accuracies for each ROI network, condition, and group. The blue and red bars indicate the significant and non-significant cross-validated classification accuracies (threshold is  $p < .05$ ) from the SVM, respectively.

**Table S3:** Signal Detection Metrics for each ROI network, condition, and group.

|                       | Metric             | <u>Experimental Condition</u> |       |       | <u>Control Condition</u> |       |       |
|-----------------------|--------------------|-------------------------------|-------|-------|--------------------------|-------|-------|
|                       |                    | TD                            | ADHD  | PDD   | TD                       | ADHD  | PDD   |
| <b>Left</b>           | <i>AUC</i>         | 97.51                         | 73.50 | 66.02 | 73.96                    | 68.75 | 57.42 |
| <b>Frontoparietal</b> | <i>Sensitivity</i> | 89.47                         | 75.00 | 50.00 | 89.47                    | 75.00 | 50.00 |
|                       | <i>Specificity</i> | 94.74                         | 60.00 | 68.75 | 73.68                    | 55.00 | 62.5  |
| <b>Right</b>          | <i>AUC</i>         | 85.32                         | 65.25 | 73.83 | 57.62                    | 56.50 | 48.44 |
| <b>Frontoparietal</b> | <i>Sensitivity</i> | 78.95                         | 60.00 | 68.75 | 52.63                    | 60.00 | 43.75 |
|                       | <i>Specificity</i> | 89.47                         | 75.00 | 68.75 | 73.68                    | 65.00 | 62.50 |
| <b>Salience</b>       | <i>AUC</i>         | 77.84                         | 56.50 | 93.75 | 42.11                    | 52.00 | 71.09 |
|                       | <i>Sensitivity</i> | 73.68                         | 50.00 | 81.25 | 36.84                    | 55.00 | 68.75 |
|                       | <i>Specificity</i> | 73.68                         | 60.00 | 93.75 | 42.11                    | 50.00 | 62.50 |
| <b>Default Mode</b>   | <i>AUC</i>         | 84.49                         | 84.00 | 74.22 | 57.62                    | 80.00 | 76.17 |
|                       | <i>Sensitivity</i> | 73.68                         | 75.00 | 68.75 | 52.63                    | 70.00 | 62.50 |
|                       | <i>Specificity</i> | 84.21                         | 80.00 | 62.50 | 47.37                    | 80.00 | 81.25 |
| <b>Sensorimotor</b>   | <i>AUC</i>         | 80.61                         | 68.25 | 83.59 | 61.50                    | 49.25 | 78.52 |
|                       | <i>Sensitivity</i> | 73.68                         | 70.00 | 75.00 | 63.16                    | 50.00 | 81.25 |
|                       | <i>Specificity</i> | 78.95                         | 65.00 | 81.25 | 63.16                    | 65.00 | 75.00 |

### *Whole Brain Univariate Results for Spatial and Verbal Working Memory Tasks*

In order to verify that the fMRI task reliably activated key working memory related regions, we averaged whole-brain activations for spatial and verbal working memory experimental conditions for each group. In accordance with predictions, the tasks significantly activate regions in the frontoparietal network and deactivate midline regions associated with the DMN in each group. Peak voxels for each cluster are shown in Table S4.



**Table S4:** MNI Coordinates of significant peak activations for both spatial and verbal working memory tasks. Signification clusters were thresholded at  $p < .001$  and cluster corrected with a threshold of  $\alpha = .01$ . Asterisk(\*) denotes significant negative activation.

| Contrast            | Cluster                             | Voxels | X   | Y   | Z   | Stat  |
|---------------------|-------------------------------------|--------|-----|-----|-----|-------|
| <b>TD</b>           |                                     |        |     |     |     |       |
| <i>Verbal Task</i>  |                                     |        |     |     |     |       |
| Positive            | Dorsal Anterior Cingulate Cortex    | 593    | 5   | -11 | 53  | 6.61  |
|                     | Left Anterior Insula                | 416    | 44  | -20 | 8   | 5.96  |
|                     | Left Precentral Cortex              | 385    | 38  | 29  | 62  | 6.09  |
|                     | Right Inferior Temporal Cortex      | 376    | -44 | 68  | -2  | 5.04  |
|                     | Left Inferior Temporal Cortex       | 300    | 47  | 77  | -2  | 5.28  |
|                     | Left Superior Parietal Lobule       | 222    | 26  | 74  | 44  | 5.49  |
|                     | Left Dorsolateral Prefrontal Cortex | 218    | 44  | -11 | 32  | 4.98  |
|                     | Right Anterior Insula               | 169    | -35 | -26 | 2   | 5.31  |
|                     | Right Superior Parietal Lobule      | 129    | -32 | 65  | 56  | 4.77  |
|                     | Right Cerebellum                    | 85     | -11 | 71  | -23 | 5.77  |
| Negative            | Left Posterior Cingulate*           | 164    | 14  | 59  | 17  | -5.53 |
|                     | Ventromedial Frontal Cortex*        | 113    | 8   | -56 | -2  | -5.33 |
|                     | Left Precuneus*                     | 64     | 41  | 77  | 35  | -4.54 |
|                     | Left Parahippocampal Cortex*        | 41     | 32  | 41  | -8  | -4.89 |
| <i>Spatial Task</i> |                                     |        |     |     |     |       |
| Positive            | Bilateral Inferior Parietal Cortex  | 1986   | 44  | 44  | 41  | 6.15  |
|                     | Dorsal Anterior Cingulate Cortex    | 109    | -2  | -23 | 41  | 6.18  |
|                     | Left Inferior Temporal Cortex       | 440    | 47  | 74  | -5  | 5.40  |
|                     | Right Inferior Temporal Cortex      | 182    | -50 | 59  | -11 | 4.79  |
|                     | Left Precentral Cortex              | 175    | 32  | 5   | 56  | 5.86  |
|                     | Left Anterior Insula                | 146    | 32  | -26 | -5  | 5.74  |
|                     | Right Anterior Insula               | 136    | -32 | -26 | -5  | 6.46  |
|                     | Left Cerebellum                     | 128    | 8   | 74  | -20 | 5.64  |
|                     | Right Cerebellum                    | 74     | -32 | 50  | -32 | 5.07  |
|                     | Right Middle Frontal Gyrus          | 65     | -35 | -44 | 32  | 4.47  |
|                     | Left Thalamus                       | 54     | 11  | 17  | 8   | 5.26  |
|                     | Left Putamen                        | 40     | 23  | -14 | -2  | 4.83  |
|                     | Left Cuneus                         | 33     | 14  | 71  | 5   | 3.83  |
|                     | Left Dorsolateral Prefrontal Cortex | 30     | 47  | -8  | 29  | 4.05  |
|                     | Left Caudate                        | 29     | 17  | 2   | 17  | 4.39  |
|                     | Right Caudate                       | 28     | -14 | -20 | 2   | 4.04  |
| Negative            | Ventromedial Frontal Cortex*        | 532    | 5   | -53 | -14 | -5.50 |
|                     | Posterior Cingulate Cortex*         | 515    | 8   | 53  | 32  | -5.86 |
|                     | Left Angular Gyrus*                 | 164    | 47  | 68  | 32  | -5.30 |
|                     | Left Orbitofrontal Cortex*          | 66     | 38  | -35 | -11 | -4.62 |
|                     | Left Inferior Frontal Cortex*       | 53     | 56  | -32 | 2   | -4.80 |
|                     | Left Superior Frontal Cortex*       | 41     | 14  | -47 | 47  | -4.78 |
| <b>ADHD</b>         |                                     |        |     |     |     |       |
| <i>Verbal Task</i>  |                                     |        |     |     |     |       |
| Positive            | Left Precentral Cortex              | 160    | 35  | 23  | 68  | 4.87  |
|                     | Dorsal Anterior Cingulate Cortex    | 131    | 8   | -11 | 50  | 4.89  |
|                     | Left Inferior Temporal Cortex       | 85     | 44  | 65  | -11 | 5.64  |
|                     | Left Dorsolateral Prefrontal Cortex | 64     | 53  | -11 | 32  | 4.67  |
|                     | Left Inferior Parietal Cortex       | 32     | 47  | 47  | 47  | 4.27  |
|                     | Right Inferior Temporal Cortex      | 24     | -50 | 77  | -8  | 4.25  |
| Negative            | Left Posterior Cingulate Cortex*    | 161    | 8   | 53  | 32  | -5.68 |
|                     | Right Posterior Cingulate Cortex*   | 80     | -14 | 59  | 20  | -5.08 |
|                     | Left Parahippocampal Cortex*        | 31     | 29  | 44  | -8  | -4.49 |

|                                  |                                      |                              |     |     |     |       |
|----------------------------------|--------------------------------------|------------------------------|-----|-----|-----|-------|
| <i>Spatial Task</i>              |                                      |                              |     |     |     |       |
| Positive                         | Bilateral Inferior Parietal Cortex   | 1851                         | 38  | 26  | 59  | 5.73  |
|                                  | Dorsal Anterior Cingulate Cortex     | 376                          | 5   | -11 | 50  | 5.40  |
|                                  | Right Middle Frontal Gyrus           | 90                           | -29 | 2   | 62  | 4.41  |
|                                  | Right Dorsolateral Prefrontal cortex | 86                           | -47 | -14 | 32  | 4.91  |
|                                  | Right Inferior Temporal Cortex       | 71                           | -56 | 62  | -11 | 4.44  |
|                                  | Left Inferior Temporal Cortex        | 71                           | 53  | 68  | -5  | 4.72  |
|                                  | Left Precentral Cortex               | 59                           | 44  | 2   | 38  | 4.71  |
|                                  | Left Anterior Insula                 | 57                           | 32  | -26 | 5   | 4.91  |
|                                  | Right Dorsolateral Prefrontal Cortex | 54                           | -41 | -38 | 35  | 4.69  |
|                                  | Right Anterior Insula                | 50                           | -35 | -26 | -2  | 5.61  |
|                                  | Left Cerebellum                      | 30                           | 11  | 77  | -26 | 4.34  |
|                                  | Right Visual Cortex                  | 26                           | -32 | 95  | 5   | 4.10  |
|                                  | Negative                             | Ventromedial Frontal Cortex* | 129 | -2  | -56 | -8    |
| Left Posterior Cingulate Cortex* |                                      | 55                           | 5   | 50  | 14  | -4.74 |
| Left Posterior Cingulate Cortex* |                                      | 44                           | -2  | 44  | 32  | -4.51 |
| <b>PDD</b>                       |                                      |                              |     |     |     |       |
| <i>Verbal Task</i>               |                                      |                              |     |     |     |       |
| Positive                         | Left Inferior Parietal Cortex        | 419                          | 29  | 56  | 47  | 4.99  |
|                                  | Dorsal Anterior Cingulate Cortex     | 246                          | -2  | -20 | 47  | 4.82  |
|                                  | Right Inferior Parietal Cortex       | 156                          | -32 | 71  | 38  | 3.80  |
|                                  | Left Inferior Temporal Cortex        | 138                          | 41  | 65  | -11 | 4.83  |
|                                  | Left Anterior Insula                 | 97                           | 35  | -20 | 11  | 5.34  |
|                                  | Right Anterior Insula                | 91                           | -35 | -23 | 8   | 4.90  |
|                                  | Right Inferior Temporal Cortex       | 86                           | -50 | 68  | 2   | 4.72  |
|                                  | Left Cerebellum                      | 76                           | 38  | 71  | -32 | 4.78  |
|                                  | Right Cerebellum                     | 71                           | -29 | 68  | -26 | 5.11  |
|                                  | Left Dorsolateral Prefrontal Cortex  | 61                           | 50  | -5  | 38  | 4.77  |
|                                  | Right Dorsolateral Prefrontal Cortex | 45                           | -41 | -47 | 20  | 4.04  |
|                                  | Right Occipital Cortex               | 42                           | -41 | 92  | -2  | 4.65  |
|                                  | Mid Cerebellum                       | 31                           | -11 | 71  | -26 | 4.90  |
|                                  | Left Thalamus                        | 28                           | 14  | 14  | 5   | 4.63  |
|                                  | Negative                             | Posterior Cingulate Cortex*  | 321 | -8  | 53  | 20    |
| Ventromedial Prefrontal Cortex*  |                                      | 174                          | 2   | -41 | -5  | -4.79 |
| Left Superior Frontal Cortex*    |                                      | 74                           | 20  | -50 | 41  | -4.62 |
| Right Orbitofrontal Cortex*      |                                      | 28                           | -38 | -38 | -11 | -4.59 |
| Right Superior Frontal Cortex*   |                                      | 28                           | -23 | -35 | 44  | -4.61 |
| Left Parahippocampal Cortex*     |                                      | 26                           | 32  | 35  | -14 | -4.32 |
| Right Parahippocampal Cortex*    |                                      | 24                           | -26 | 45  | -14 | -4.08 |
| <i>Spatial Task</i>              |                                      |                              |     |     |     |       |
| Positive                         | Left Inferior Parietal Cortex        | 521                          | 50  | 44  | 53  | 5.80  |
|                                  | Right Inferior Parietal Cortex       | 436                          | -38 | 56  | 56  | 5.69  |
|                                  | Right Dorsolateral Prefrontal Cortex | 273                          | -50 | -11 | 41  | 4.76  |
|                                  | Dorsal Anterior Cingulate Cortex     | 148                          | -5  | -11 | 53  | 4.98  |
|                                  | Left Precentral Cortex               | 90                           | 29  | 5   | 62  | 5.19  |
|                                  | Left Precentral Cortex               | 50                           | 50  | -5  | 38  | 4.90  |
|                                  | Right Superior Frontal Cortex        | 45                           | -26 | -2  | 59  | 4.16  |
| Negative                         | Left Posterior Cingulate Cortex*     | 65                           | 11  | 50  | 32  | -3.98 |

*NNI for activation  $p < .001$  for all images, cluster corrected at  $p < .01$*

## References

Thomason, M. E., Race, E., Burrows, B., Whitfield-Gabrieli, S., Glover, G. H., & Gabrieli, J.

D. E. (2009). Development of Spatial and Verbal Working Memory Capacity in the Human Brain. *Journal of Cognitive Neuroscience*, *21*(2), 316–332.

<https://doi.org/10.1162/jocn.2008.21028>

Zhu, W., Zeng, N. F., & Wang, N. (2010). *Sensitivity , Specificity , Accuracy , Associated Confidence Interval and ROC Analysis with Practical SAS*.
